# Supplementary material for: Ultraviolet radiation exposure time and intensity modulate tomato resistance to herbivory through activation of jasmonic acid signaling
Source: PubMed Central journal article supplement (PMC6305188; doi:10.1093/jxb/ery347), 2018-10-09
Supplement: ery347_suppl_supplementary_figures_s1-s3_table_s1-s3.pdf [file ery347_suppl_supplementary_figures_s1-s3_table_s1-s3.pdf]

## Supplementary data

### Ultraviolet radiation exposure time and intensity modulate tomato resistance to herbivory through activation of jasmonic acid signaling

Rocío Escobar-Bravo<sup>1</sup>, Gang Chen<sup>1</sup>, Hye Kyong Kim<sup>1</sup>, Katharina Grosser<sup>2,3</sup>, Nicole M. van Dam<sup>2,3</sup>, Kirsten A. Leiss<sup>1\*</sup>, Peter GL. Klinkhamer<sup>1</sup>.

<sup>1</sup>Plant Science and Natural Products, Institute of Biology Leiden (IBL), Leiden University. Sylviusweg 72, 2333BE Leiden (The Netherlands).

<sup>2</sup>Molecular Interaction Ecology, German Center for Integrative Biodiversity Research (iDiv), Halle-Gena-Leipzig, Deutscher Platz 5e, 04103 Leipzig (Germany).

<sup>3</sup>Friedrich Schiller University Jena, Institute of Biodiversity, Dornburger-Str. 159, 07743 Jena (Germany).

\*Current address: Wageningen University & Research, Business Unit Horticulture, Violierenweg 1, 2665MV Bleiswijk (The Netherlands).

To whom correspondence should be addressed:

Rocío Escobar-Bravo, E-mail: [r.bravo@biology.leidenuniv.nl](mailto:r.bravo@biology.leidenuniv.nl)

This file contains information on supplementary Fig. S1, S2 and S3, Table S1, S2 and S3.

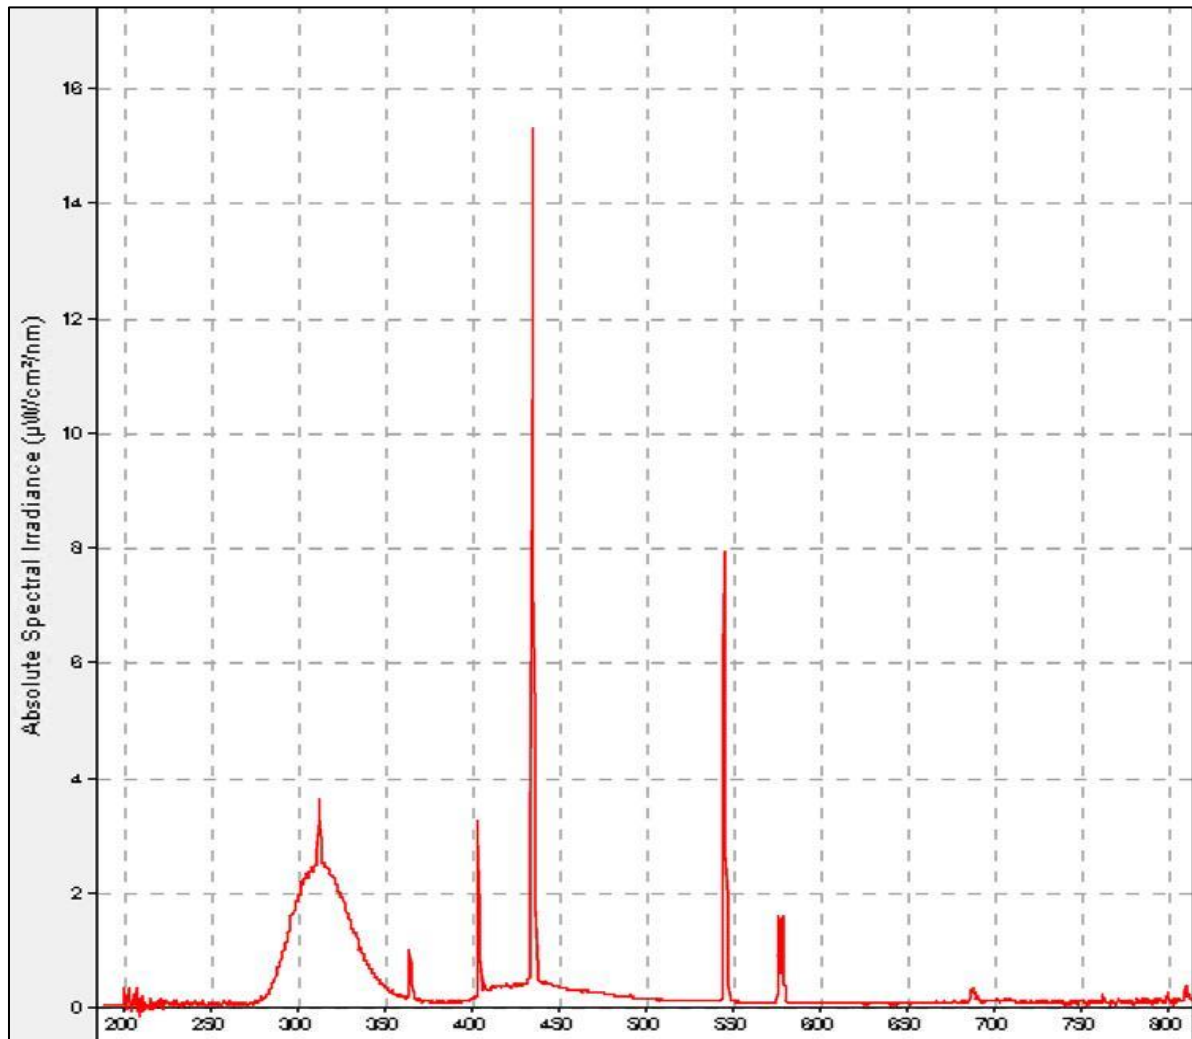

**Figure S1.** Spectral irradiance of the UV lamps after wrapping with white cellulose filters. UV lamps emit residual (< 10% of total PAR ) blue ( $\lambda$  400-450 nm), green ( $\lambda$  520-560), and yellow ( $\lambda$  560-590 nm) light. PAR levels in the UV growth chamber did not differ from the control (no UV) growth chamber.

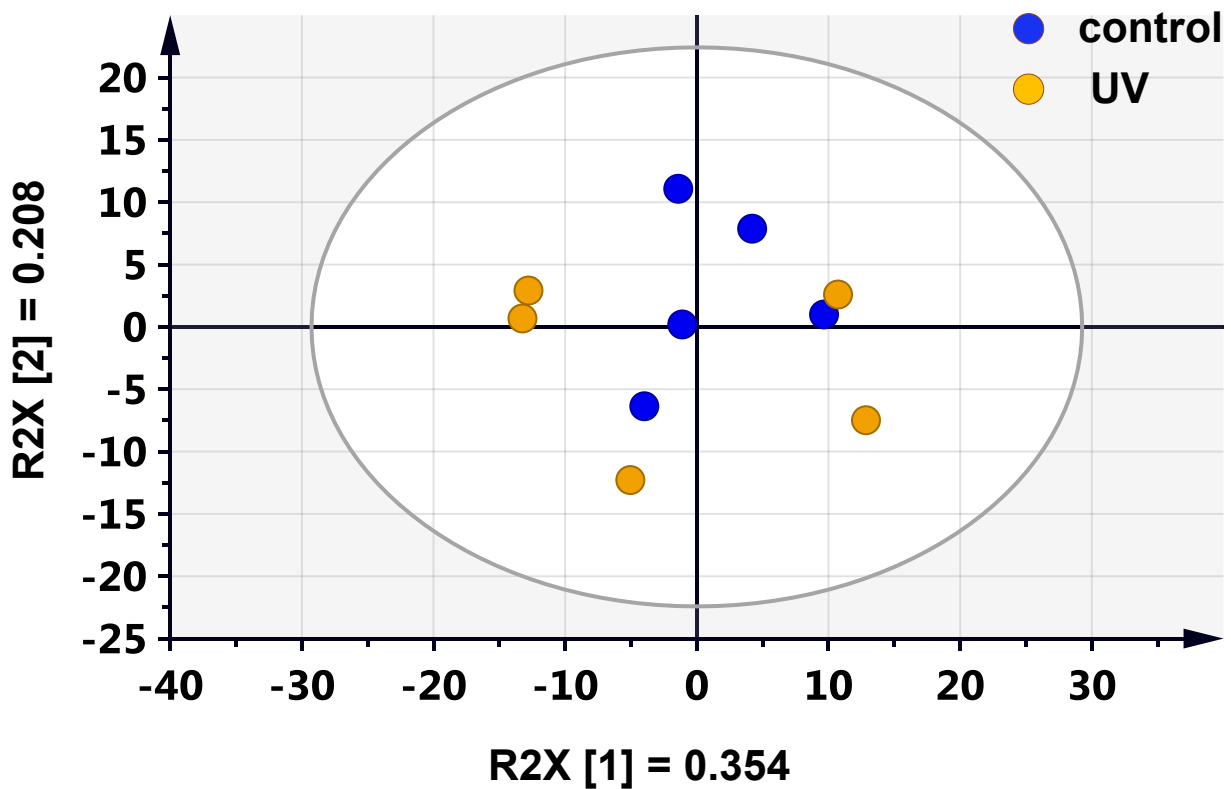

**Figure S2.** Metabolic responses in control and UV-treated Moneymaker tomato plants was determined at 14 days after the start of the light treatments. Leaf metabolites were analyzed by NMR on leaflets collected from the third/fourth youngest leaf. The  $^1\text{H}$  NMR spectra was subjected to principal component analysis and resulted in a model with four principal components explaining 85% of the variance. The first two components, explaining 35.5 and 20.8% of the variance, are represented in the graph. The ellipse defines the Hotelling's T2 confidence region (95%).

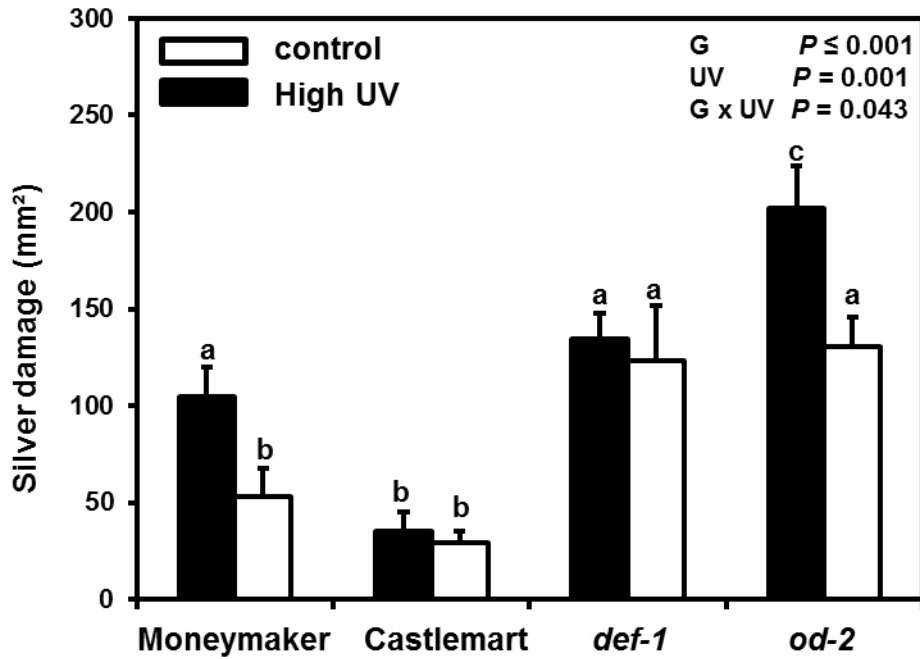

**Figure S3.** Thrips-associated damage (i.e. ‘silver damage’ symptoms) was evaluated in Moneymaker, Castlemart, *def-1* and *odorless-2* (*od-2*) plants that were first subjected to control or high UV irradiance treatments for 28 days and subsequently used for non-choice whole-plant thrips bioassays. Silver damage was evaluated at 7 days after thrips infestation. Supplemental control (no UV) or high UV irradiance conditions were applied for 30 min d<sup>-1</sup>. Values represent the mean + SEM (n = 7-9 individual plants). Different letters above bars denote significant differences among groups tested by GLM followed by Fisher’s LSD test ( $P \leq 0.05$ ).

**Table S1.** Measurements of UV irradiance were carried out at the plant canopy level at day 1, 3, 7, 10 and 14 after the start of the light treatments. The integrated irradiance ( $\mu\text{W cm}^2$ ) was converted to  $\text{kJ m}^2 \text{d}^{-1}$  to estimate the daily UV doses.

| Measurements | Integrated Irradiance<br>( $\mu\text{W cm}^2$ ) |                       |                     | Total daily UV doses<br>( $\text{kJ m}^2 \text{d}^{-1}$ ) |           |           |           |            |            |
|--------------|-------------------------------------------------|-----------------------|---------------------|-----------------------------------------------------------|-----------|-----------|-----------|------------|------------|
|              | UV-B<br>280-315<br>nm                           | UV-A<br>315-400<br>nm | UV<br>280-400<br>nm | 15<br>min                                                 | 30<br>min | 45<br>min | 60<br>min | 120<br>min | 180<br>min |
| Day 1        | 7.6                                             | 9.25                  | 16.85               | 0.15                                                      | 0.30      | 0.454     | 0.606     | 1.212      | 1.818      |
| Day 3        | 7.6                                             | 9.06                  | 16.66               | 0.149                                                     | 0.299     | 0.449     | 0.599     | 1.198      | 1.797      |
| Day 7        | 8.77                                            | 10.2                  | 19.01               | 0.175                                                     | 0.342     | 0.513     | 0.684     | 1.36       | 2.04       |
| Day 10       | 9.19                                            | 10.76                 | 19.95               | 0.175                                                     | 0.359     | 0.538     | 0.718     | 1.436      | 2.154      |
| Day 14       | 10.89                                           | 12.6                  | 23.49               | 0.211                                                     | 0.422     | 0.634     | 0.845     | 1.6        | 2.4        |
| Averaged     | 8.81                                            | 10.37                 | 19.19               | 0.172                                                     | 0.344     | 0.517     | 0.69      | 1.360      | 2.04       |

**Table S2.** Transitions or specific pair of m/z values associated to the precursors and fragment ions of the analytes measured by LC/MS.

| Analyte             | Q1 [m/z] $\rightarrow$ Q3 [m/z] <sup>a</sup> | CE [V] | Standard  |
|---------------------|----------------------------------------------|--------|-----------|
| ABA                 | (-)263.13 $\rightarrow$ 153.00               | 9      | D6-ABA    |
| JA                  | (-)209.12 $\rightarrow$ 59.00                | 12     | D6-JA     |
| JA-Ile              | (-)322.20 $\rightarrow$ 130.00               | 19     | D6-JA-Ile |
| SA                  | (-) 137.02 $\rightarrow$ 93.00               | 15     | D6-SA     |
| IAA                 | (+) 176.07 $\rightarrow$ 130.00              | -14    | D5-IAA    |
| D6-ABA              | (-) 269.17 $\rightarrow$ 159.00              | 10     |           |
| D6-JA               | (-)215.15 $\rightarrow$ 59.00                | 10     |           |
| D6-JA-Ile           | (-) 328.24 $\rightarrow$ 130.00              | 19     |           |
| D6-SA               | (-)141.05 $\rightarrow$ 97.00                | 15     |           |
| D5-IAA <sup>b</sup> | (+) 181.10 $\rightarrow$ 135.00              | -14    |           |
|                     | (+) 181.10 $\rightarrow$ 134.00              | -14    |           |
|                     | (+) 181.10 $\rightarrow$ 133.00              | -14    |           |
| OPDA                | (-) 291.00 $\rightarrow$ 165.00              | 18     | D6-JA-Ile |

CE: collision energy

<sup>a</sup> Resolution: Q1: 0.7, Q3: 22

<sup>b</sup> Analyzed as the sum of all three transitions

**Table S3.** Nucleotide sequence of primers used for qRT-PCR analysis.

| Target gene   | Gene identification | Forward Primer         | Reverse Primer        |
|---------------|---------------------|------------------------|-----------------------|
|               |                     | 5' → 3'                | 5' → 3'               |
| <i>PR-P6</i>  | Solyc00g174340      | GTACTGCATCTTCTTGTTCC A | TAGATAAGTGCTTGATGTGCC |
| <i>TD-2</i>   | Solyc09g008670      | TGCCGTAAAAATGTCACCA    | ACTGGCGATGCCAAAATATC  |
| <i>JIP-21</i> | Solyc03g098790      | ACTCGTCCTGTGCTTTGTCC   | CCCAAGAGGATTTTCGTTGA  |
| <i>Actin</i>  | Solyc03g078400      | TTAGCACCTTCCAGCAGATGT  | AACAGACAGGACACTCGCACT |
